# Supplementary material for: Role of Contrast-Enhanced Ultrasound as a Second-Line Diagnostic Modality in Noninvasive Diagnostic Algorithms for Hepatocellular Carcinoma
Source: PubMed Central journal article supplement — Korean J Radiol. 2020 Nov 3;22(3):354–65. doi: 10.3348/kjr.2020.0973 (PMC7909851; doi:10.3348/kjr.2020.0973), 2020-11-03
Supplement: kjr-22-354-s002.pdf [file kjr-22-354-s002.pdf]

**Supplementary Table 1. CEUS Parameters for Each Ultrasound Machine**

| Probe                  | RS80A or RS85A | LOGIQ E9 | Aplio i800 |
|------------------------|----------------|----------|------------|
|                        | CA1-7A         | C1-6     | i8CX1      |
| Mechanical index       | 0.08           | 0.14     | 0.06       |
| Dynamic range          | 50             | 60       | 60         |
| Gain (%)               | 50-60          | 60-70    | 60-70      |
| Frame rate (picture/s) | 9-12           | 10       | 12-20      |

RS80A or RS85A, Samsung Medison; LOGIQ E9, GE healthcare; Aplio i800, Canon Medical Systems. CEUS = contrast-enhanced ultrasound
