# Supplementary material for: Role of Contrast-Enhanced Ultrasound as a Second-Line Diagnostic Modality in Noninvasive Diagnostic Algorithms for Hepatocellular Carcinoma
Source: PubMed Central journal article supplement — Korean J Radiol. 2020 Nov 3;22(3):354–65. doi: 10.3348/kjr.2020.0973 (PMC7909851; doi:10.3348/kjr.2020.0973), 2020-11-03
Supplement: kjr-22-354-s003.pdf [file kjr-22-354-s003.pdf]

**Supplementary Table 2. Major Feature Comparisons of 103 Observations in Gd-EOB-MRI and CEUS**

| Diagnosis                   | APHE       |           |          | Rim APHE   |          |          | Distinctive Washout* |           |          |
|-----------------------------|------------|-----------|----------|------------|----------|----------|----------------------|-----------|----------|
|                             | Gd-EOB-MRI | CEUS      | <i>P</i> | Gd-EOB-MRI | CEUS     | <i>P</i> | Gd-EOB-MRI           | CEUS      | <i>P</i> |
| <b>Reviewer 1</b>           |            |           |          |            |          |          |                      |           |          |
| HCC (n = 79)                | 69 (87.3)  | 71 (89.9) | 0.79     | 5 (6.3)    | 0 (0)    | 0.06     | 62 (83.8)            | 51 (64.6) | 0.04     |
| Non-HCC malignancy (n = 15) | 3 (20)     | 6 (40)    | 0.25     | 12 (80)    | 6 (40)   | 0.03     | 1 (33.3)             | 0 (0)     | 0.99     |
| Benign lesion (n = 9)       | 3 (33.3)   | 3 (33.3)  | N/A      | 1 (11.1)   | 1 (11.1) | N/A      | 3 (37.5)             | 0 (0)     | 0.25     |
| Total (n = 103)             | 75 (72.8)  | 80 (77.7) | 0.33     | 18 (17.5)  | 7 (6.8)  | 0.001    | 66 (64.1)            | 51 (49.5) | 0.01     |
| <b>Reviewer 2</b>           |            |           |          |            |          |          |                      |           |          |
| HCC (n = 79)                | 72 (91.1)  | 68 (86.1) | 0.61     | 5 (6.3)    | 0 (0)    | 0.06     | 59 (79.7)            | 48 (60.8) | 0.01     |
| Non-HCC malignancy (n = 15) | 2 (13.3)   | 6 (40)    | 0.13     | 7 (46.7)   | 9 (60)   | 0.69     | 5 (62.5)             | 0 (0)     | 0.50     |
| Benign lesion (n = 9)       | 3 (33.3)   | 4 (44.4)  | 0.99     | 1 (11.1)   | 0 (0)    | 0.99     | 4 (50.0)             | 0 (0)     | 0.13     |
| Total (n = 103)             | 77 (74.8)  | 78 (75.7) | 0.82     | 13 (12.6)  | 9 (8.7)  | 0.39     | 68 (66)              | 48 (46.6) | < 0.01   |

Numbers in parentheses are percentages. \*Washout on portal venous phase of Gd-EOB-MRI, or mild and late ( $\geq 60$  seconds) washout on CEUS. Observation showing rim APHE were excluded from washout evaluation. APHE = arterial phase hyperenhancement, Gd-EOB-MRI = gadoxetate disodium-enhanced magnetic resonance imaging, HCC = hepatocellular carcinoma
