# Supplementary material for: Role of Contrast-Enhanced Ultrasound as a Second-Line Diagnostic Modality in Noninvasive Diagnostic Algorithms for Hepatocellular Carcinoma
Source: PubMed Central journal article supplement — Korean J Radiol. 2020 Nov 3;22(3):354–65. doi: 10.3348/kjr.2020.0973 (PMC7909851; doi:10.3348/kjr.2020.0973), 2020-11-03
Supplement: kjr-22-354-s004.pdf [file kjr-22-354-s004.pdf]

**Supplementary Table 3. The Diagnostic Ability of Gd-EOB-MRI with CEUS as a Second-Line Modality to Identify HCC among the at Risk Observations by Reviewer 2**

| Guidelines                                           | Gd-EOB-MRI                    |                      |                      | Gd-EOB-MRI, Then CEUS* |                      |                      | P           |             |          |
|------------------------------------------------------|-------------------------------|----------------------|----------------------|------------------------|----------------------|----------------------|-------------|-------------|----------|
|                                                      | Sensitivity                   | Specificity          | Accuracy             | Sensitivity            | Specificity          | Accuracy             | Sensitivity | Specificity | Accuracy |
| All (n = 103)                                        |                               |                      |                      |                        |                      |                      |             |             |          |
| EASL                                                 | 74.7<br>(63.6, 83.8)          | 100<br>(85.8, 100)   | 0.87<br>(0.79, 0.93) | 82.3<br>(72.1, 89.9)   | 100<br>(85.8, 100)   | 0.91<br>(0.84, 0.96) | 0.01        | N/A         | 0.01     |
| KLCA-NCC                                             | 88.6<br>(79.5, 94.7)          | 87.5<br>(67.6, 97.3) | 0.88<br>(0.80, 0.94) | 93.7<br>(85.8, 97.9)   | 87.5<br>(67.6, 97.3) | 0.91<br>(0.83, 0.95) | 0.04        | N/A         | 0.04     |
| Noninvasive diagnostic criteria of CEUS <sup>†</sup> | CEUS with sulfur hexafluoride |                      |                      |                        |                      |                      |             |             |          |
|                                                      | 59.5<br>(47.9, 70.4)          | 100<br>(85.8, 100)   | 0.80<br>(0.71, 0.87) |                        |                      |                      |             |             |          |
| Pathologic proven (n = 57)                           |                               |                      |                      |                        |                      |                      |             |             |          |
| EASL                                                 | 67.7<br>(49.5, 82.6)          | 100<br>(85.2, 100)   | 0.84<br>(0.72, 0.92) | 79.4<br>(62.1, 91.3)   | 100<br>(85.2, 100)   | 0.90<br>(0.79, 0.96) | 0.045       | N/A         | 0.01     |
| KLCA-NCC                                             | 76.5<br>(58.8, 89.3)          | 86.9<br>(66.4, 97.2) | 0.82<br>(0.69, 0.91) | 93.7<br>(85.8, 97.9)   | 87.5<br>(67.6, 97.3) | 0.91<br>(0.83, 0.95) | 0.045       | N/A         | 0.01     |
| Noninvasive diagnostic criteria of CEUS <sup>†</sup> | CEUS with sulfur hexafluoride |                      |                      |                        |                      |                      |             |             |          |
|                                                      | 70.6<br>(52.5, 84.9)          | 100<br>(85.2, 100)   | 0.85<br>(0.73, 0.93) |                        |                      |                      |             |             |          |

Numbers in parentheses are 95% confidence intervals. \*CEUS was performed when MRI presented inconclusive image features for noninvasive diagnosis of HCC, <sup>†</sup>Noninvasive diagnostic criteria of CEUS were APHE ( $\geq 1$  cm) with mild and late ( $\geq 60$  seconds) washout in CEUS LI-RADS v2017, EASL and KCLA-NCC guidelines. EASL = European Association for the Study of the Liver, KLCA-NCC = Korean Liver Cancer Association and the National Cancer Center, LI-RADS = Liver Imaging-Reporting and Data System
