# Supplementary material for: Role of Contrast-Enhanced Ultrasound as a Second-Line Diagnostic Modality in Noninvasive Diagnostic Algorithms for Hepatocellular Carcinoma
Source: PubMed Central journal article supplement — Korean J Radiol. 2020 Nov 3;22(3):354–65. doi: 10.3348/kjr.2020.0973 (PMC7909851; doi:10.3348/kjr.2020.0973), 2020-11-03
Supplement: kjr-22-354-s005.pdf [file kjr-22-354-s005.pdf]

**Supplementary Table 4. Additional Role of CEUS in False-Positive and False-Negative Cases in Gd-EOB-MRI by Reviewer 2**

|                   | Gd-EOB-MRI |          |
|-------------------|------------|----------|
|                   | EASL       | KLCA-NCC |
| HCCs (n = 79)     | (-)        | (-)      |
| CEUS              |            |          |
| (-)               | 6 (7.6)    | 4 (5.1)  |
| (+)               | 14 (17.7)  | 5 (6.3)  |
| Non-HCCs (n = 24) | (+)        | (+)      |
| CEUS              |            |          |
| (-)               | 0 (0.0)    | 0 (0.0)  |
| (+)               | 0 (0.0)    | 3 (12.5) |

Numbers in parentheses are percentages. (+) refers to noninvasively diagnoses of HCC.
